# Supplementary material for: Association between serum uric acid and colorectal cancer risk in European population: a two-sample Mendelian randomization study
Source: PubMed Central journal article supplement (PMC11246881; doi:10.3389/fonc.2024.1394320), 2024-07-01

## Supplementary Tables

Supplementary Table S1 Characteristics of 26 serum uric acid-associated SNPs

| SNP        | Chr | BP (Build 36) | Gene     | EA | OA | EAF  | $\beta$ | SE    | P         | F-statistic |
|------------|-----|---------------|----------|----|----|------|---------|-------|-----------|-------------|
| rs1471633  | 1   | 144435096     | PDZK1    | A  | C  | 0.46 | 0.059   | 0.005 | 1.2E-29   | 139.06      |
| rs11264341 | 1   | 153418117     | TRIM46   | T  | C  | 0.43 | -0.05   | 0.006 | 6.2E-19   | 69.40       |
| rs1260326  | 2   | 27584444      | GCKR     | T  | C  | 0.41 | 0.074   | 0.005 | 1.2E-44   | 218.60      |
| rs17050272 | 2   | 121022910     | INHBB    | A  | G  | 0.43 | 0.035   | 0.006 | 1.6E-10   | 34.02       |
| rs6770152  | 3   | 53075254      | SFMBT1   | T  | G  | 0.58 | -0.044  | 0.005 | 2.6E-16   | 77.38       |
| rs12498742 | 4   | 9553150       | SLC2A9   | A  | G  | 0.77 | 0.373   | 0.006 | <1.0E-300 | 3733.82     |
| rs2231142  | 4   | 89271347      | ABCG2    | T  | G  | 0.11 | 0.217   | 0.009 | 1.0E-134  | 57.28       |
| rs17632159 | 5   | 72467238      | TMEM171  | C  | G  | 0.31 | -0.039  | 0.006 | 3.5E-11   | 42.23       |
| rs675209   | 6   | 7047083       | RREB1    | T  | C  | 0.27 | 0.061   | 0.006 | 1.3E-23   | 103.26      |
| rs1165151  | 6   | 25929595      | SLC17A1  | T  | G  | 0.47 | -0.091  | 0.005 | 7.0E-70   | 330.24      |
| rs729761   | 6   | 43912549      | VEGFA    | T  | G  | 0.30 | -0.047  | 0.006 | 8.0E-16   | 61.33       |
| rs1178977  | 7   | 72494985      | BAZ1B    | A  | G  | 0.81 | 0.047   | 0.007 | 1.2E-12   | 45.06       |
| rs10480300 | 7   | 151036938     | PRKAG2   | T  | C  | 0.28 | 0.035   | 0.006 | 4.1E-09   | 34.02       |
| rs17786744 | 8   | 23832951      | STC1     | A  | G  | 0.58 | -0.029  | 0.005 | 1.4E-08   | 33.63       |
| rs2941484  | 8   | 76641323      | HNF4G    | T  | C  | 0.44 | 0.044   | 0.005 | 4.4E-17   | 77.38       |
| rs1171614  | 10  | 61139544      | SLC16A9  | T  | C  | 0.22 | -0.079  | 0.007 | 2.3E-28   | 127.22      |
| rs10821905 | 10  | 52316099      | A1CF     | A  | G  | 0.18 | 0.057   | 0.007 | 7.4E-17   | 66.26       |
| rs2078267  | 11  | 64090690      | SLC22A11 | T  | C  | 0.51 | -0.073  | 0.006 | 9.4E-38   | 147.83      |
| rs478607   | 11  | 64234639      | NRXN2    | A  | G  | 0.84 | -0.047  | 0.007 | 4.4E-11   | 45.06       |
| rs3741414  | 12  | 56130316      | INHBC    | T  | C  | 0.24 | -0.072  | 0.007 | 2.2E-25   | 48.98       |
| rs653178   | 12  | 110492139     | ATXN2    | T  | C  | 0.51 | -0.035  | 0.005 | 7.2E-12   | 48.98       |
| rs1394125  | 15  | 73946038      | UBE2Q2   | A  | G  | 0.34 | 0.043   | 0.006 | 2.5E-13   | 51.34       |
| rs6598541  | 15  | 97088658      | IGF1R    | A  | G  | 0.36 | 0.043   | 0.006 | 4.8E-15   | 51.34       |
| rs7193778  | 16  | 68121391      | NFAT5    | T  | C  | 0.86 | -0.046  | 0.008 | 8.2E-10   | 30.05       |
| rs7188445  | 16  | 78292488      | MAF      | A  | G  | 0.33 | -0.032  | 0.005 | 1.6E-09   | 40.94       |
| rs7224610  | 17  | 50719787      | HLF      | A  | C  | 0.58 | -0.042  | 0.005 | 5.4E-17   | 70.51       |

SNP: single-nucleotide polymorphism; Chr: chromosome; EA: effect allele; OA: other allele; EAF: effect allele frequency;  $\beta$ : regression coefficient; SE: standard error.

Supplementary Table S2 Gender-specific effects for 26 serum uric acid-associated SNPs

| SNP        | Chr | EA | OA | Males-specific effect |       |          | Females-specific effect |       |           |
|------------|-----|----|----|-----------------------|-------|----------|-------------------------|-------|-----------|
|            |     |    |    | $\beta$               | SE    | P        | $\beta$                 | SE    | P         |
| rs1471633  | 1   | A  | C  | 0.069                 | 0.008 | 3.5E-15  | 0.054                   | 0.007 | 1.6E-14   |
| rs11264341 | 1   | T  | C  | -0.055                | 0.009 | 1.1E-08  | -0.044                  | 0.007 | 9.1E-09   |
| rs1260326  | 2   | T  | C  | 0.091                 | 0.009 | 3.0E-25  | 0.063                   | 0.007 | 1.1E-18   |
| rs17050272 | 2   | A  | G  | 0.049                 | 0.010 | 6.5E-07  | 0.030                   | 0.008 | 1.9E-04   |
| rs6770152  | 3   | T  | G  | -0.052                | 0.009 | 6.7E-09  | -0.047                  | 0.007 | 6.0E-11   |
| rs12498742 | 4   | A  | G  | 0.269                 | 0.010 | 6.4E-153 | 0.460                   | 0.008 | <1.0E-700 |
| rs2231142  | 4   | T  | G  | 0.270                 | 0.014 | 3.8E-75  | 0.181                   | 0.011 | 1.3E-52   |
| rs17632159 | 5   | C  | G  | -0.043                | 0.010 | 1.3E-05  | -0.039                  | 0.008 | 1.1E-06   |
| rs675209   | 6   | T  | C  | 0.060                 | 0.010 | 3.3E-09  | 0.064                   | 0.008 | 2.0E-15   |
| rs1165151  | 6   | T  | G  | -0.096                | 0.008 | 1.3E-28  | -0.089                  | 0.007 | 4.2E-37   |
| rs729761   | 6   | T  | G  | -0.047                | 0.010 | 3.2E-06  | -0.047                  | 0.008 | 8.1E-09   |
| rs1178977  | 7   | A  | G  | 0.055                 | 0.011 | 8.2E-07  | 0.046                   | 0.009 | 2.6E-07   |
| rs10480300 | 7   | T  | C  | 0.043                 | 0.010 | 1.7E-05  | 0.024                   | 0.008 | 3.2E-03   |
| rs17786744 | 8   | A  | G  | -0.033                | 0.009 | 2.1E-04  | -0.029                  | 0.007 | 5.0E-05   |
| rs2941484  | 8   | T  | C  | 0.048                 | 0.009 | 6.2E-08  | 0.046                   | 0.007 | 1.3E-10   |
| rs1171614  | 10  | T  | C  | -0.086                | 0.011 | 1.9E-13  | -0.067                  | 0.009 | 3.0E-13   |
| rs10821905 | 10  | A  | G  | 0.042                 | 0.011 | 3.8E-04  | 0.060                   | 0.009 | 2.5E-10   |
| rs2078267  | 11  | T  | C  | -0.085                | 0.009 | 2.9E-19  | -0.071                  | 0.007 | 5.7E-20   |
| rs478607   | 11  | A  | G  | -0.058                | 0.012 | 9.6E-07  | -0.043                  | 0.009 | 8.8E-06   |
| rs3741414  | 12  | T  | C  | -0.091                | 0.011 | 7.0E-16  | -0.057                  | 0.009 | 4.3E-10   |
| rs653178   | 12  | T  | C  | -0.085                | 0.009 | 2.9E-19  | -0.071                  | 0.007 | 5.7E-20   |
| rs1394125  | 15  | A  | G  | 0.060                 | 0.010 | 6.3E-09  | 0.032                   | 0.008 | 1.0E-04   |
| rs6598541  | 15  | A  | G  | 0.039                 | 0.009 | 2.7E-05  | 0.050                   | 0.007 | 1.6E-11   |
| rs7193778  | 16  | T  | C  | -0.048                | 0.012 | 2.1E-04  | -0.045                  | 0.010 | 1.0E-05   |
| rs7188445  | 16  | A  | G  | -0.025                | 0.009 | 7.9E-03  | -0.040                  | 0.007 | 6.4E-08   |
| rs7224610  | 17  | A  | C  | -0.043                | 0.009 | 9.0E-07  | -0.034                  | 0.007 | 3.0E-06   |

SNP: single-nucleotide polymorphism; Chr: chromosome; EA: effect allele; OA: other allele;  $\beta$ : regression coefficient; SE: standard error.

## Supplementary Figures

Supplementary Figure S1 Serum uric acid levels in 48 studies used to explore serum uric-associated SNPs.

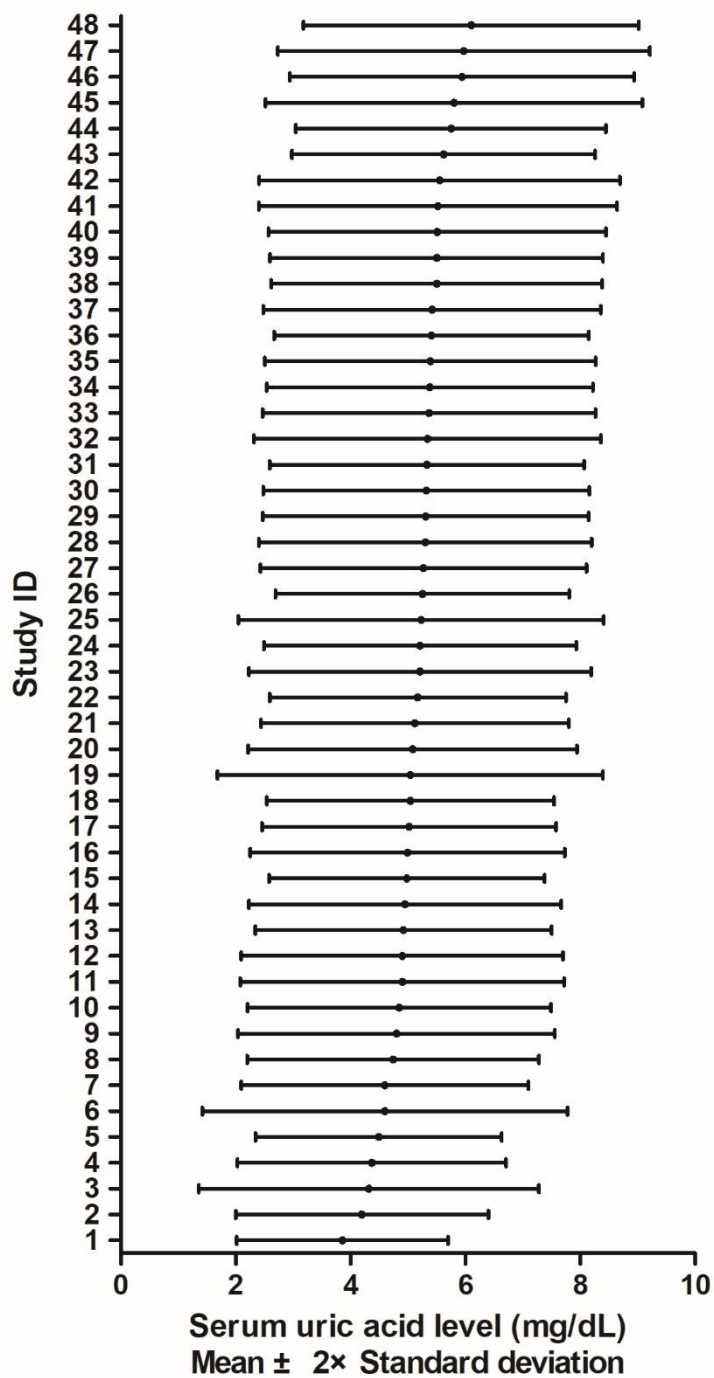

**Supplementary Figure S2** Forest plot of the correlation between SNPs and colorectal cancer.

GWAS: genome-wide association study; OR: odds ratio; CI: confidence interval.

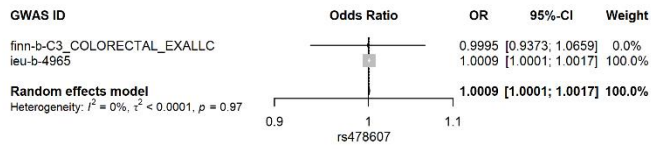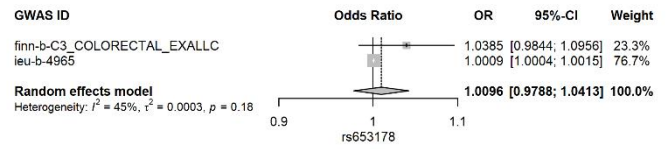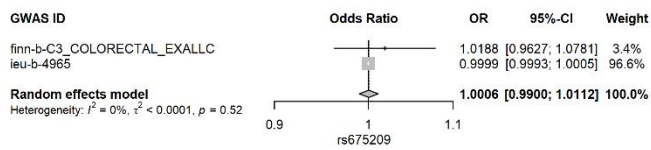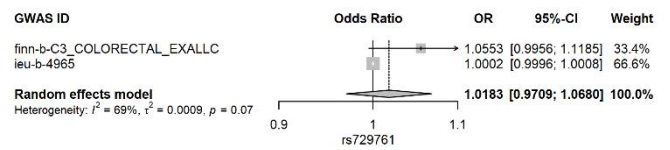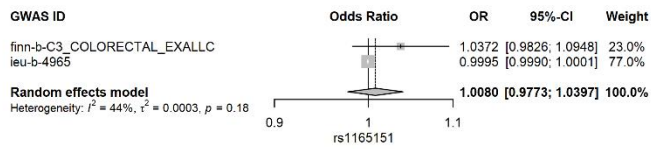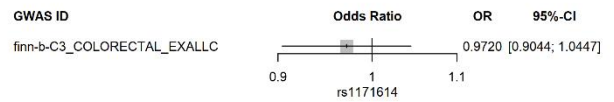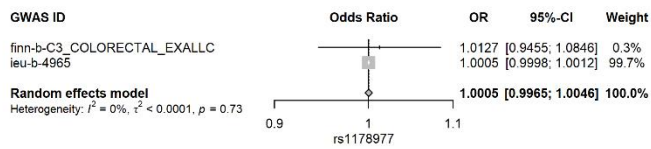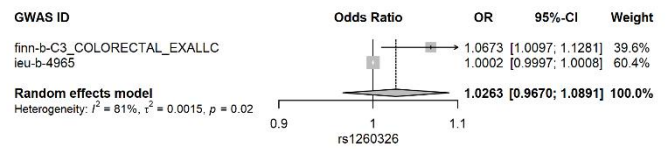

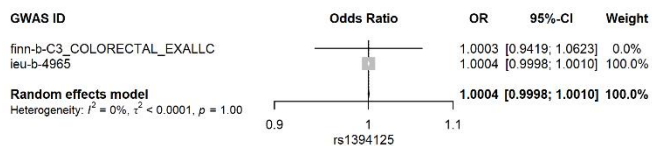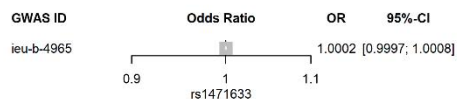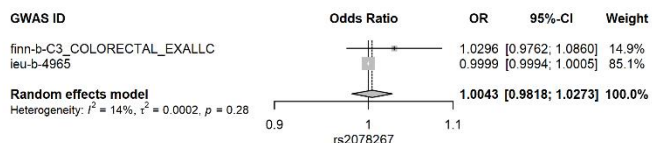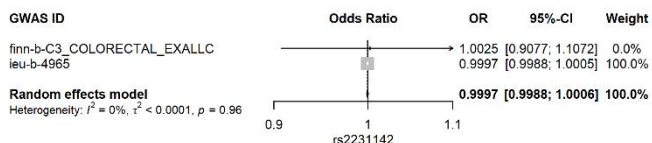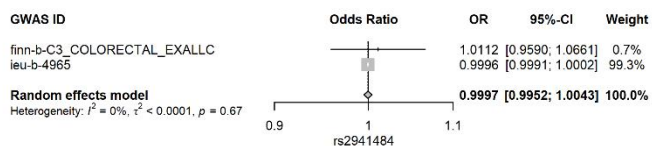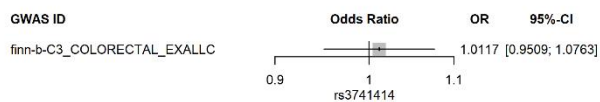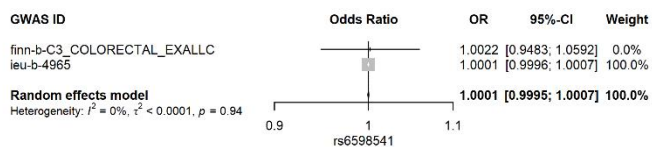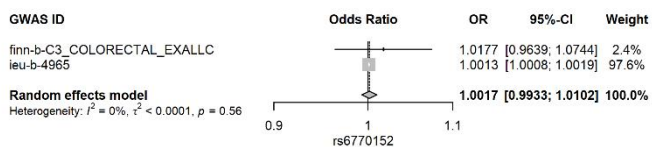

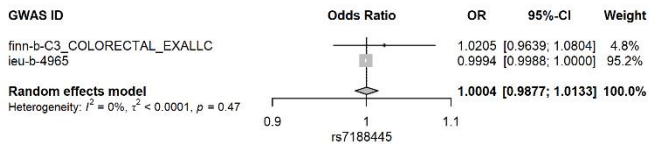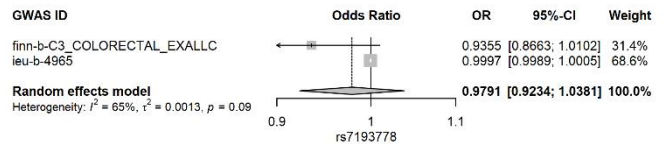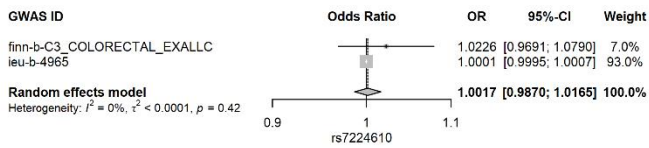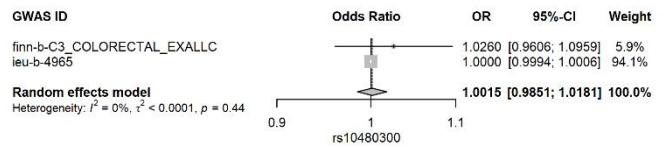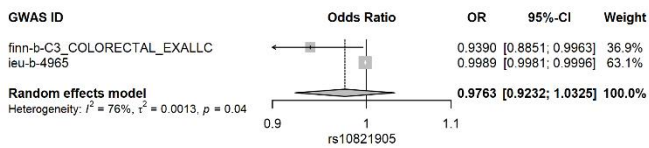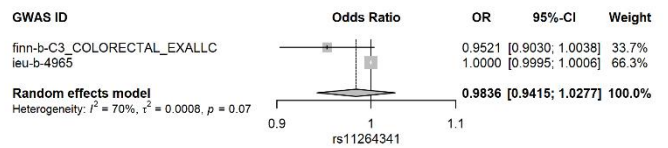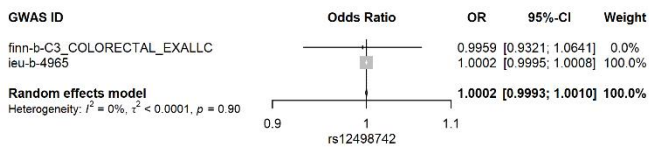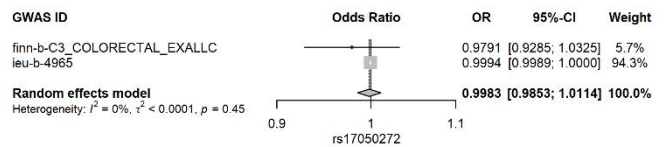

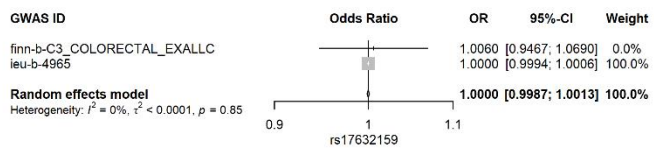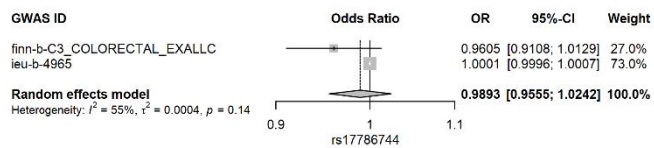

### Supplementary Figure S3 Forest plot of the correlation between SNPs and colon cancer.

GWAS: genome-wide association study; OR: odds ratio; CI: confidence interval.

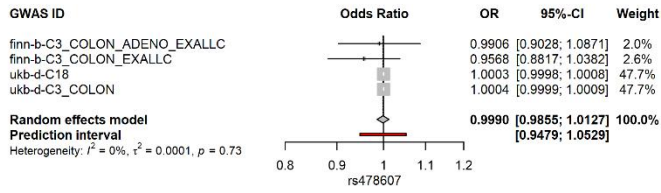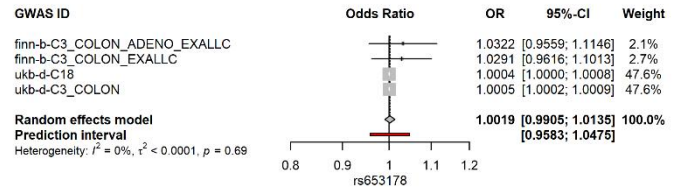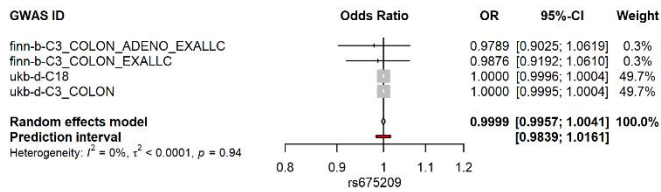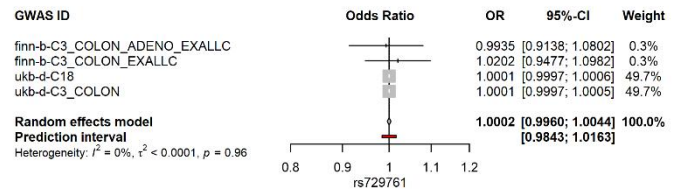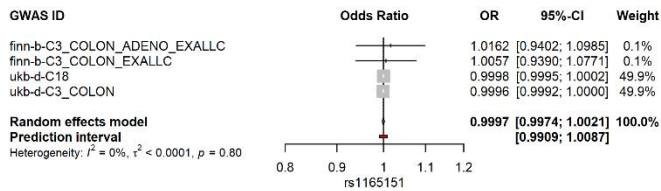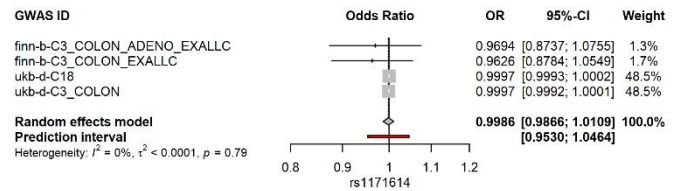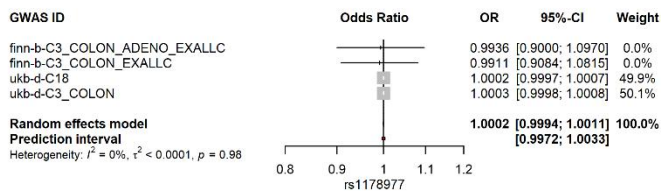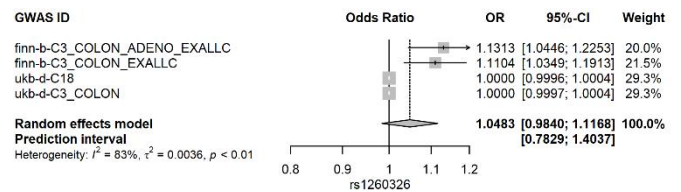



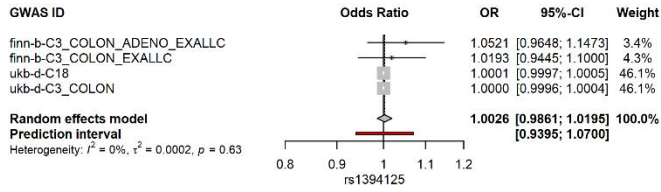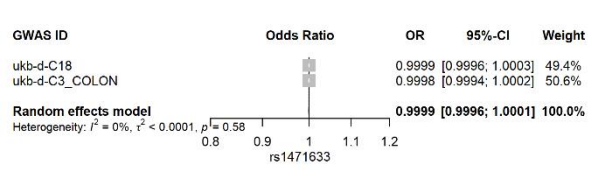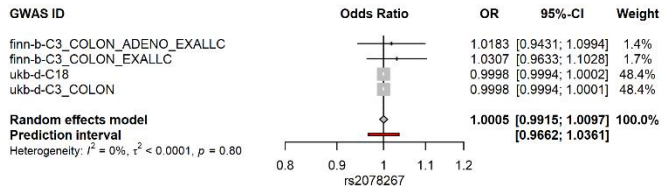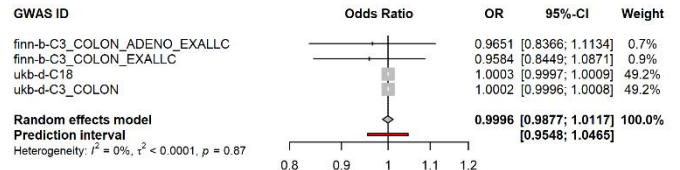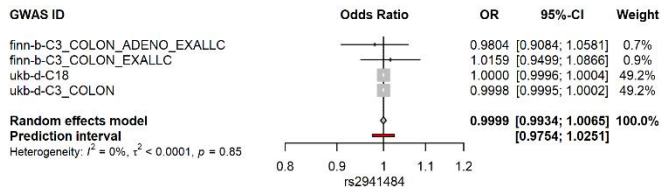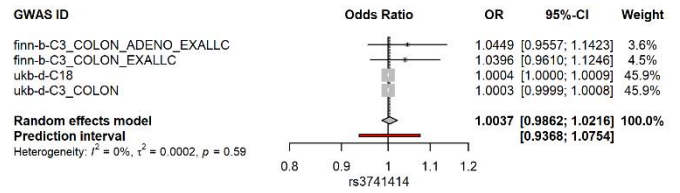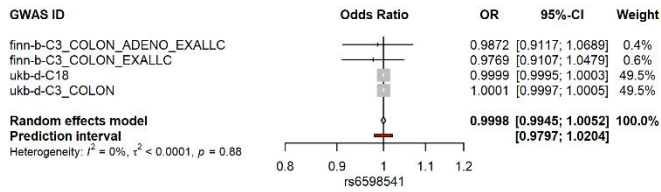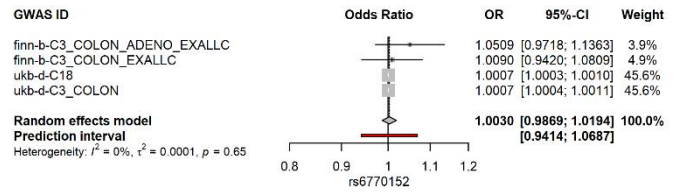

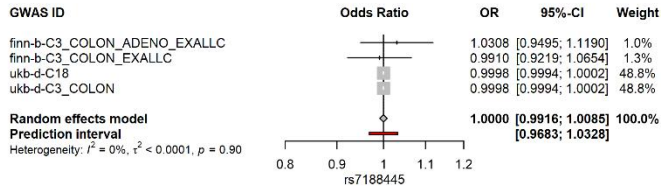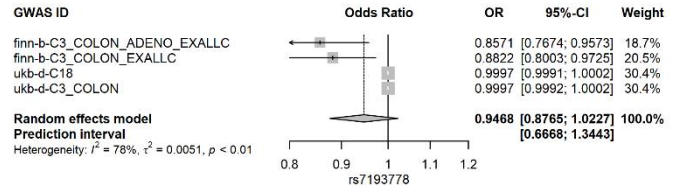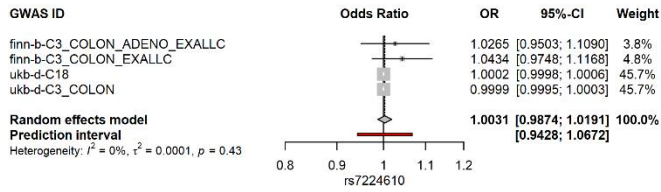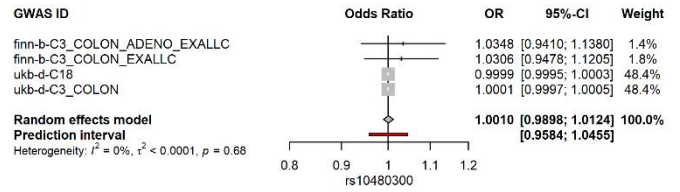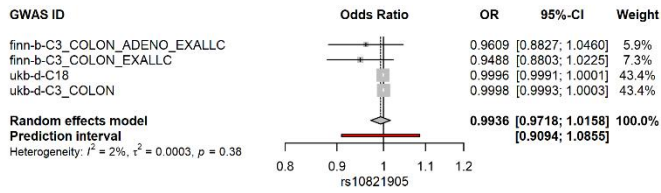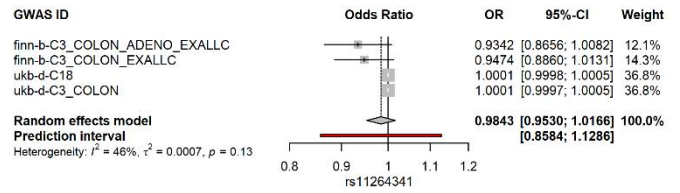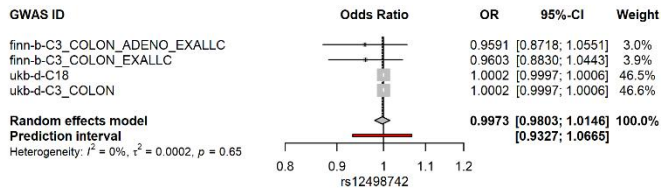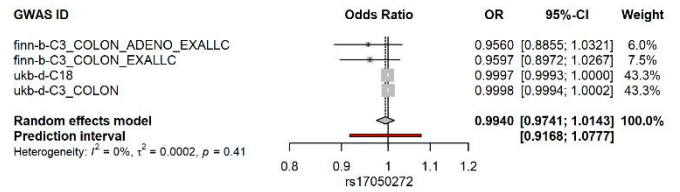

**GWAS ID**

finn-b-C3\_COLON\_ADENO\_EXALLC  
 finn-b-C3\_COLON\_EXALLC  
 ukb-d-C18  
 ukb-d-C3\_COLON

**Random effects model**

**Prediction interval**

Heterogeneity:  $I^2 = 0\%$ ,  $\tau^2 < 0.0001$ ,  $p = 0.99$

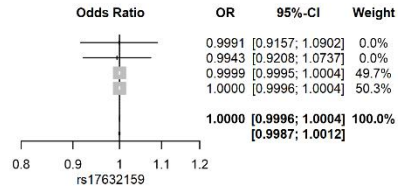

**GWAS ID**

finn-b-C3\_COLON\_ADENO\_EXALLC  
 finn-b-C3\_COLON\_EXALLC  
 ukb-d-C18  
 ukb-d-C3\_COLON

**Random effects model**

**Prediction interval**

Heterogeneity:  $I^2 = 0\%$ ,  $\tau^2 < 0.0001$ ,  $p = 0.93$

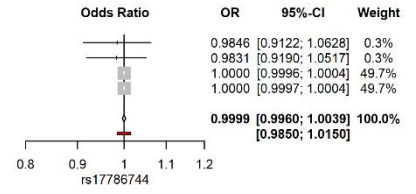

## Supplementary Figure S4 Forest plot of the correlation between SNPs and rectal cancer.

GWAS: genome-wide association study; OR: odds ratio; CI: confidence interval.

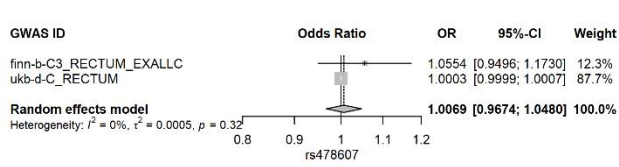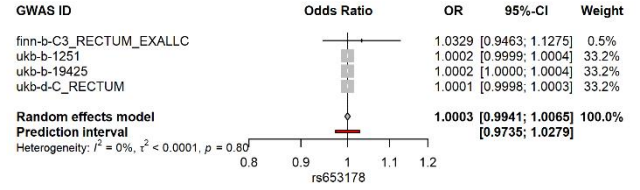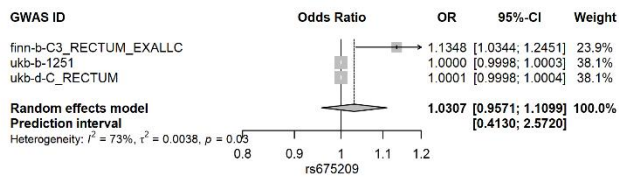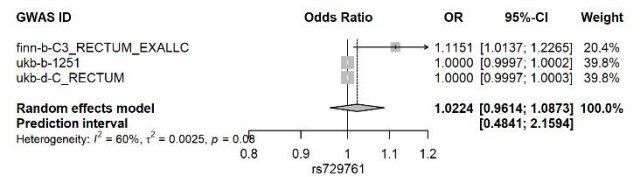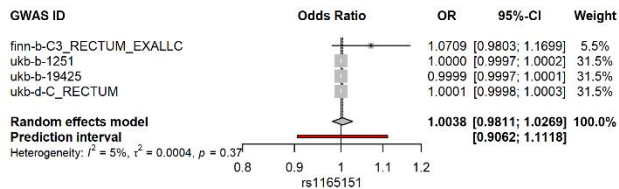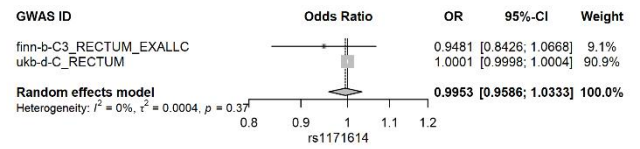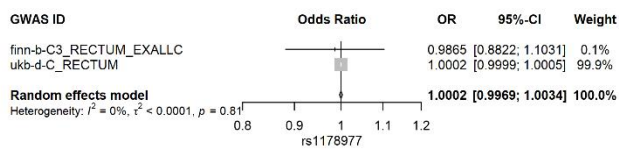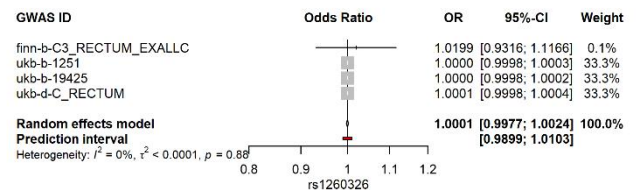

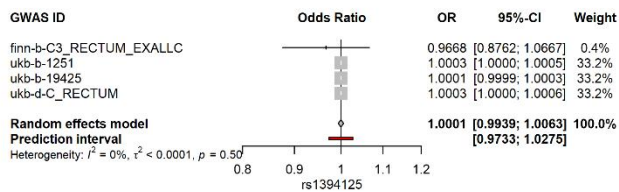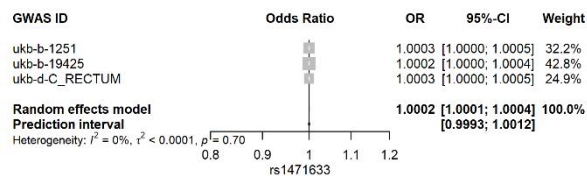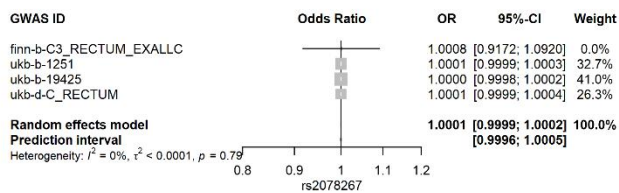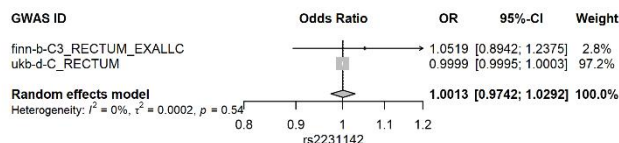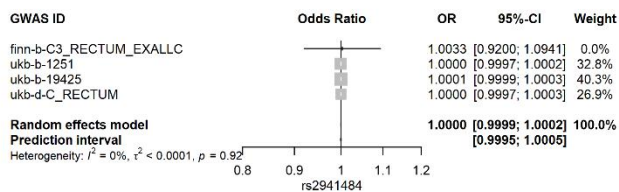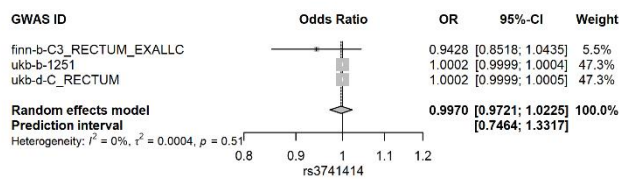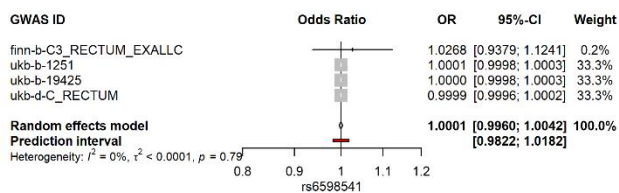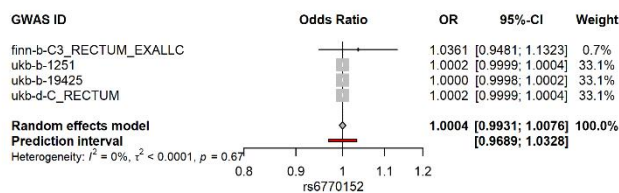

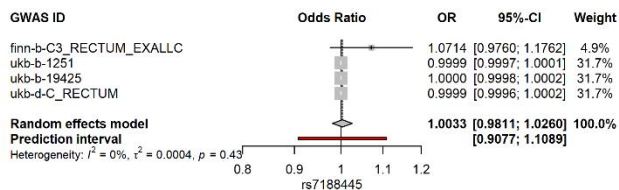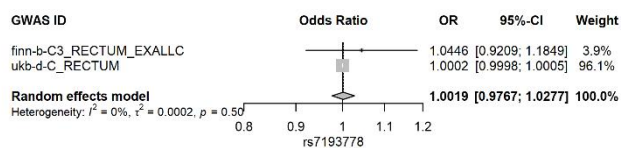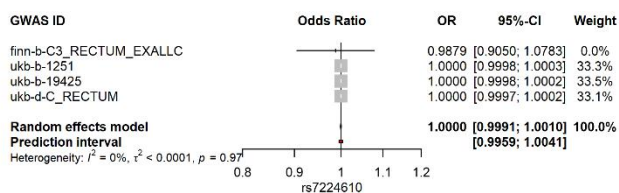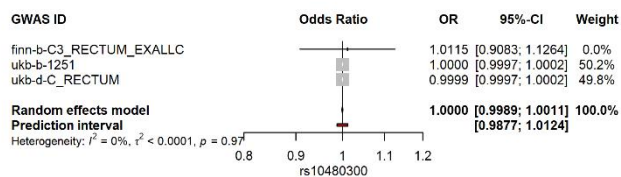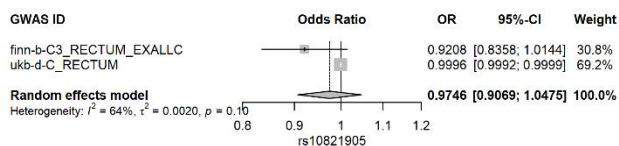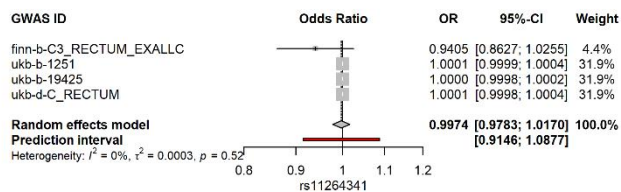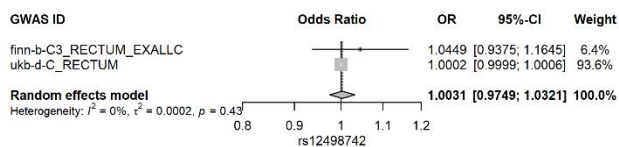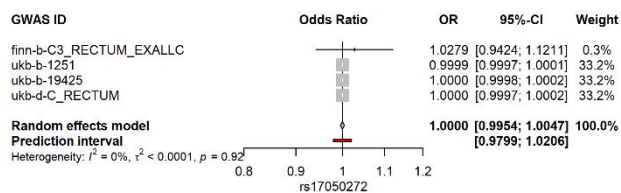

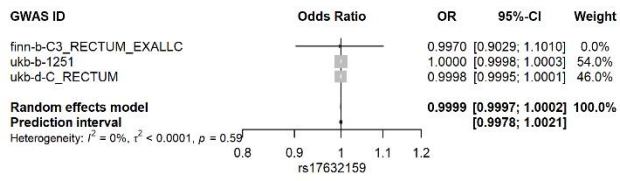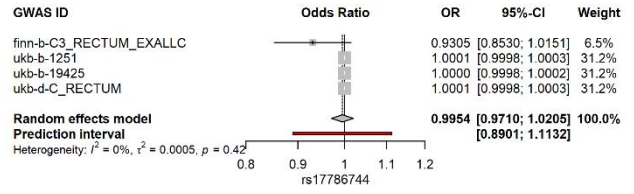

Supplement: DataSheet_1.pdf [file DataSheet_1.pdf]
